# Supplementary material
Source: publisher site journal article supplement (https://www.dovepress.com/article/358059)
Supplement: Supplementary file 1 [file get_supplementary_file.php]

**Supplementary Table 1.** ICD-10 codes used to define cataract diagnoses included in the analysis

| <b>ICD-10 Code</b> | <b>Description</b>                                             |
|--------------------|----------------------------------------------------------------|
| H25.011            | Cortical age-related cataract, right eye                       |
| H25.012            | Cortical age-related cataract, left eye                        |
| H25.013            | Cortical age-related cataract, bilateral                       |
| H25.11             | Age-related nuclear cataract, right eye                        |
| H25.12             | Age-related nuclear cataract, left eye                         |
| H25.13             | Age-related nuclear cataract, bilateral eye                    |
| H25.89             | Other age-related cataract                                     |
| H25.21             | Age-related cataract, morgagnian type (hypermature), right eye |
| H25.22             | Age-related cataract, morgagnian type (hypermature), left eye  |
| H25.23             | Age-related cataract, morgagnian type (hypermature), bilateral |
| H25.811            | Combined forms of age-related cataract, right eye              |
| H25.812            | Combined forms of age-related cataract, left eye               |
| H25.813            | Combined forms of age-related cataract, bilateral              |

---

**Abbreviations:** ICD-10=International Classification of Diseases, 10th revision.

**Supplementary Table 2.** IOL model names and keywords to identify brand and type of IOL

| Type                                | Brand                                                                                                                            |                                                                                                                                  |
|-------------------------------------|----------------------------------------------------------------------------------------------------------------------------------|----------------------------------------------------------------------------------------------------------------------------------|
|                                     | Alcon                                                                                                                            | Johnson & Johnson                                                                                                                |
| <b>Monofocal</b>                    | SN60WF, SA60WF,<br>SN60AT, SA60AT                                                                                                | ZCB00                                                                                                                            |
| <b>Monofocal toric</b>              | SN6AT3, SN6AT4,<br>SN6AT5, SN6AT6,<br>SN6AT7, SN6AT8,<br>SN6AT9, SA6AT3,<br>SA6AT4, SA6AT5,<br>SA6AT6, SA6AT7,<br>SA6AT8, SA6AT9 | ZCT150, ZCT225,<br>ZCT300, ZCT400,<br>ZCT425, ZCT525,<br>ZCT600                                                                  |
| <b>Diffraction multifocal</b>       | SN6AD1, SV25T0,<br>SN6AD3,<br>keywords:<br>“ReSTOR multifocal”                                                                   | ZKB00, ZLB00, ZMB00,<br>keywords:<br>“Tecnis multifocal”                                                                         |
| <b>Diffraction multifocal toric</b> | SND1T3, SND1T4,<br>SND1T5, SND1T6,<br>SV25T3, SV25T4,<br>SV25T5, SV25T6,<br>keywords:<br>“ReSTOR multifocal<br>toric”            | NA                                                                                                                               |
| <b>Diffraction EDOF/EDF</b>         | NA                                                                                                                               | ZXR00,<br>keywords:<br>“Tecnis Symphony”,<br>“Symphony”, “EDOF”,<br>“EDF”                                                        |
| <b>Diffraction EDOF/EDF toric</b>   | NA                                                                                                                               | ZXT150, ZXT225,<br>ZXT300, ZXT375,<br>keywords:<br>“Tecnis Symphony toric”,<br>“Symphony toric”,<br>“EDOF toric”, “EDF<br>toric” |

**Abbreviations:** EDOF/EDF=extended depth of focus; IOL=intraocular lens

**Supplementary Figure 1. Patient attrition**

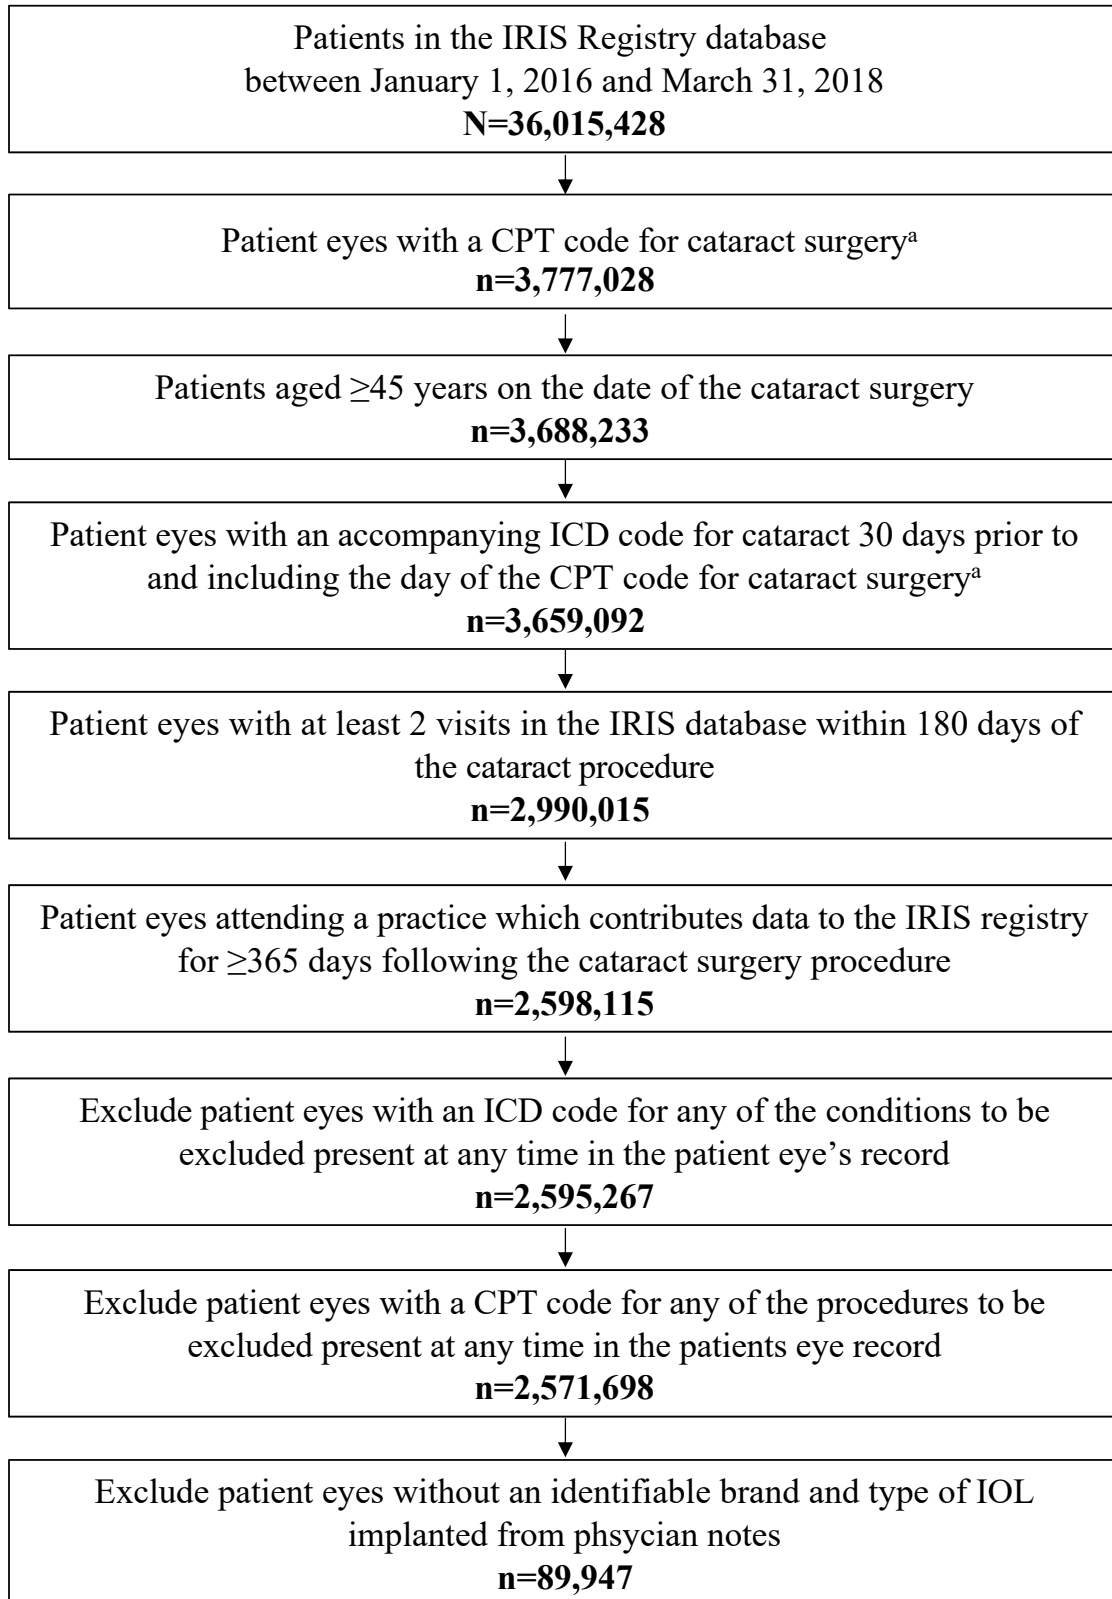

<sup>a</sup>Included information on the laterality of the diagnosis

**Abbreviations:** CPT, current procedural terminology; ICD, International Classification of Diseases; IRIS, Intelligent Research in Sight; IOL, intraocular lens.
